# Supplementary material for: APOC3-Mediated Fatty Acid Metabolism Suppresses Lung Adenocarcinoma Progression by Inhibiting GNAI3/cAMP/PKA Pathway
Source: Research Square preprint supplement (doi:10.21203/rs.3.rs-8140812/v1), 2025-12-22
Supplement: Supplementary file 2 [file e6f33fb07335f2ac4b90dc69.docx]

**Additional files**

**Supplementary Tables**

**Table S1. Summary of Patient Demographics and Clinical Characteristics**

| Variables | LUAD (*n* = 156) | BPN (*n* = 156) | NC (*n* = 44) |
| --- | --- | --- | --- |
| Age, year  ± *s*  range | 61±9  39-81 | 59±9  35-77 | 56±6  49-76 |
| Sex, n (%)  Male  Female | 97 (62.2)  59 (37.8) | 96 (61.5)  60 (38.5) | 28 (63.6)  16 (36.4) |
| Smoking, n (%)  yes  No  unknown | 52 (33.3)  100 (64.1)  4 (2.6) | 43 (27.6)  110 (70.5)  3 (1.9) |  |
| Clinical stage, n (%)  stage Ⅰ  stage Ⅱ  stage Ⅲ  stage Ⅳ  unknown | 63 (40.4)  15 (9.6)  24 (15.4)  52 (33.3)  2 (1.3) |  |  |
| Lymph node metastasis, n (%)  yes  no  unknown | 77 (49.4)  77 (49.4)  2 (1.2) |  |  |
| Distant metastasis, n (%)  yes  no  unknown | 52 (33.3)  102 (65.4)  2 (1.3) |  |  |
| Pathological type, n (%)  chronic inflammation  granuloma  necrosis  other |  | 97 (62.2)  24 (15.4)  8 (5.1)  27 (17.3) |  |

**Table S2. Characteristics of LUAD participants with follow-up**

| Clinical characteristics | n(%) | Clinical characteristics | n(%) |
| --- | --- | --- | --- |
| Number | 214 |  |  |
| Sex, n (%) |  | Survival Status, n (%) |  |
| male | 112 (52.3) | death | 88 (41.1) |
| female | 102 (47.7) | censoring | 126 (58.9) |
| Age, year |  | Survival Time, n (%) |  |
| ± *s* | 59±10 | ≥1000 | 136 (63.6) |
| range | 31-89 | ＜1000 | 78 (36.4) |
| Clinical stage, n (%) |  | Smoking History, n (%) |  |
| stage Ⅰ | 89 (41.6) | yes | 63 (29.5) |
| stage Ⅱ | 19 (8.9) | no | 146 (68.2) |
| stage Ⅲ | 28 (13.1) | unknown | 5 (2.3) |
| stage Ⅳ | 70 (32.7) | Drinking history |  |
| unknown | 8 (3.7) | yes | 25 (11.7) |
| Diameter, n (%) |  | no | 183 (85.5) |
| ≤30nm | 120 (56.1) | unknown | 6 (2.8) |
| ＞30nm | 44 (20.6) | Tumor history, n (%) |  |
| unknown | 50 (23.3) | yes | 8 (3.7) |
| Lymph node  metastasis, n (%) |  | no | 167 (78.1) |
| yes | 99 (46.3) | unknown | 39 (18.2) |
| no | 106 (49.5) | Distant metastasis, n (%) |  |
| unknown | 9 (4.2) | yes | 69 (32.2) |
|  |  | no | 131 (61.2) |
|  |  | unknown | 14 (6.6) |

LUAD: lung adenocarcinoma; ± *s*: mean ± standard deviation

**Table S3. Information of primers used in the study.**

| **Oligo Name** | **Sequence (5’-3’)** |
| --- | --- |
| APOC3 qF | 5’-GTACTCCTTGTTGTTGCCCTCCTG-3’  5’-CGGTCTTGGTGGCGTGCTTC-3’ |
| APOC3 qR |
| GAPDH qF | 5’-CAGGAGGCATTGCTGATGAT-3’  5’-GAAGGCTGGGGCTCATTT-3’ |
| GAPDH qR |

**Table S4. Information of antibodies used in the study.**

| Reagent | Catalog and Source | Dilution |
| --- | --- | --- |
| APOC3 （1:5000） | Cat#ab108205; Abcam | 1:5000 |
| E-cadherin | Cat#3195; CST | 1:1000 |
| N-cadherin | Cat#13116; CST | 1:1000 |
| Vimentin | Cat#5741; CST | 1:1000 |
| Ki-67 | Cat#84192-4-RR; Proteintech | 1:500 |
| PKA | Cat#4782; CST | 1:1000 |
| p-PKA(Thr197) | Cat#4781; CST | 1:1000 |
| CREB | Cat#9197; CST | 1:1000 |
| p-CREB(Ser133) | Cat#9198; CST | 1:1000 |
| p-HSL(Ser660) | Cat#45804; CST | 1:1000 |
| HSL | Cat#4107; CST | 1:1000 |
| PGC-1α | Cat#2178; CST | 1:1000 |
| CPT1A | Cat#12252; CST | 1:1000 |
| β-Actin | Cat#66009-1-Ig; Proteintech | 1:10000 |
| GAPDH | Cat#60004-1-Ig; Proteintech | 1:20000 |
| GNAI3 | Cat#11641-1-AP;Proteintech | 1:20000 |

**Table S5. Prognostic impact of APOC3 expression on LUAD patient survival across key clinical subgroups.**

| Characteristic | Group | Univariate analysis | | Multivariate analysis | |
| --- | --- | --- | --- | --- | --- |
| HR (95%CI) | *P* Value | HR (95%CI) | *P* Value |
| APOC3 | High | 1.00 (Reference) |  | 1.00 (Reference) |  |
|  | Low | 0.63(0.41-0.99) | 0.043 | 0.79(0.45-1.38) | 0.402 |
| Sex | female | 1.00 (Reference) |  | 1.00 (Reference) |  |
|  | male | 1.58(1.03-2.42) | 0.038 | 1.33(0.77-2.30) | 0.308 |
| Age | ≤60 | 1.00 (Reference) |  | 1.00 (Reference) |  |
|  | >60 | 1.95(1.27-3.00) | 0.002 | 1.50(0.87-2.61) | 0.146 |
| Stage | StageⅠ/Ⅱ | 1.00 (Reference) |  | 1.00 (Reference) |  |
|  | StageⅢ/Ⅳ | 3.64(2.36-5.63) | **<0.001** | 2.14(1.16-3.95) | **0.015** |
| LM | LM- | 1.00 (Reference) |  | 1.00 (Reference) |  |
|  | LM+ | 5.38(3.18-9.09) | **<0.001** | 4.07(1.71-9.71) | **0.002** |
| DM | DM- | 1.00 (Reference) |  | 1.00 (Reference) |  |
|  | DM+ | 5.93(3.69-9.51) | **<0.001** | 2.39(1.18-4.86) | **0.016** |
| Smoking | No | 1.00 (Reference) |  |  |  |
|  | Yes | 1.18(0.76-1.85) | 0.456 |  |  |
| Drinking | NO | 1.00 (Reference) |  |  |  |
|  | Yes | 1.57(0.89-2.79) | 0.123 |  |  |
| Size | ≤30 | 1.00 (Reference) |  | 1.00 (Reference) |  |
|  | >30 | 2.02(1.21-3.37) | 0.008 | 0.59(0.33-1.05) | 0.073 |

LM,lymph node metastasis DM,distant metastases HR,Hazards ratio CI,Confidence Interval

**Supplementary Figures**


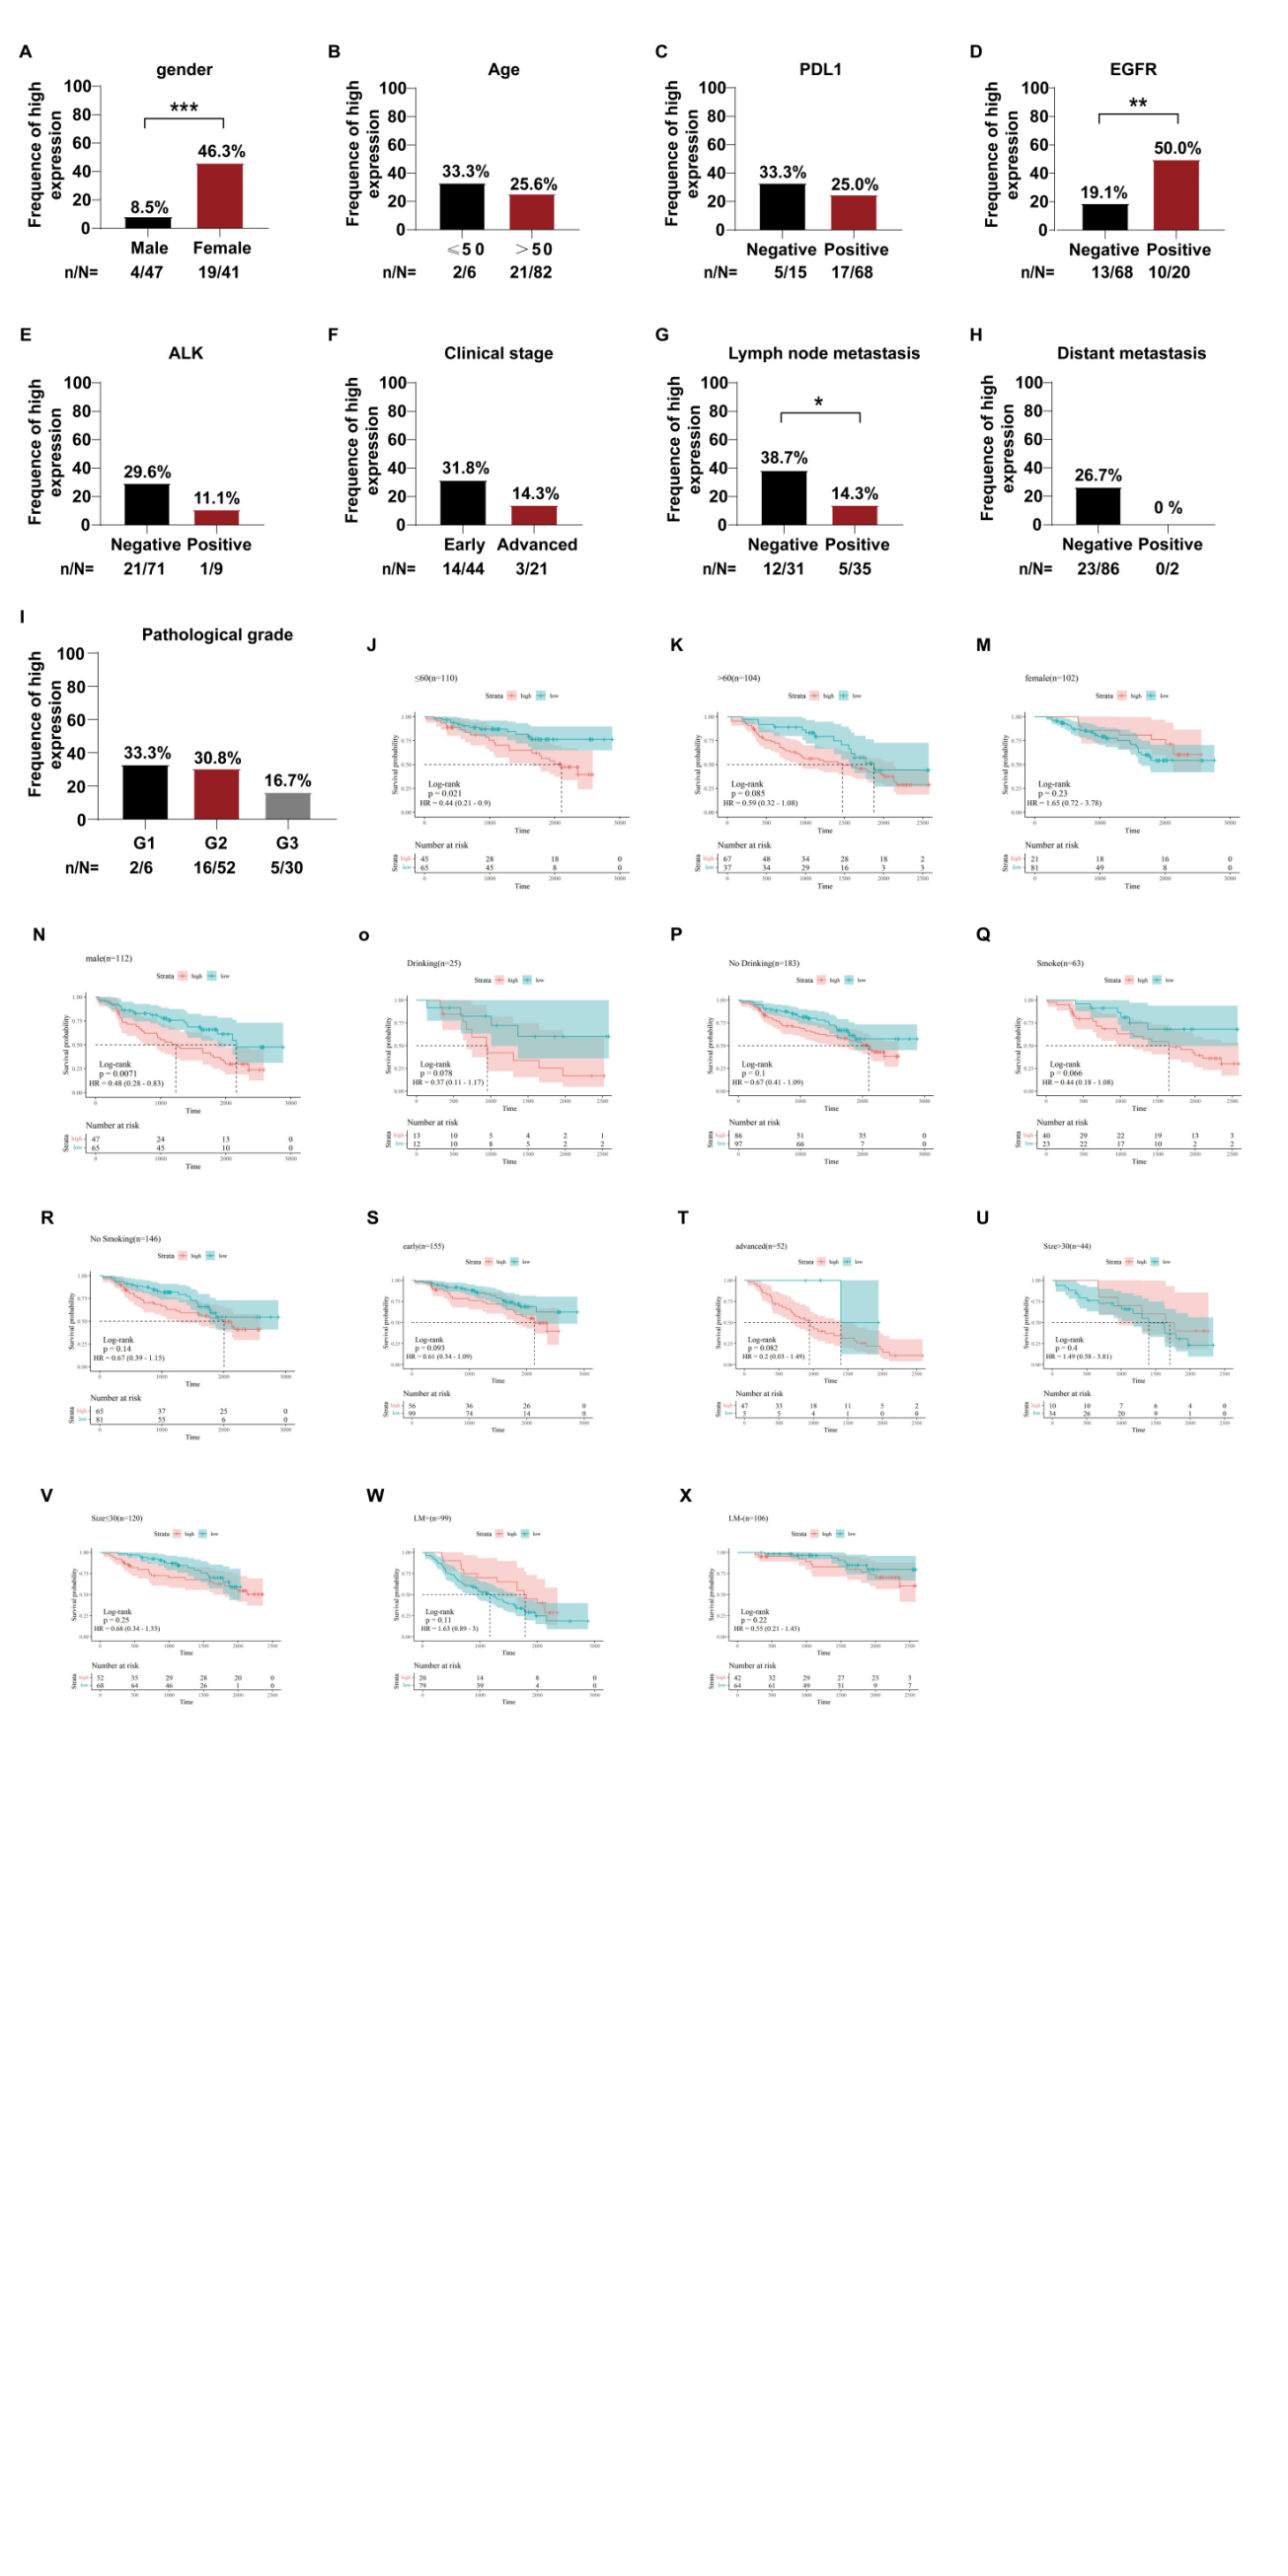


**Figure S1. APOC3 expression and its prognostic value across clinicopathological characteristics in LUAD.**

**A-I** The high expression rate of APOC3 in LUAD patients with different clinical characteristics. **J-X** Kaplan-Meier curves stratified by APOC3 expression and clinical features.

PDL1: Programmed death receptor 1; EGFR: Epidermal growth factor receptor; ALK: Anaplastic lymphoma kinase; LM: lymph node metastasis; DM: distant metastases; HR: Hazards ratio; CI: Confidence Interval. **P*<0.05，***P*<0.01，****P*<0.001


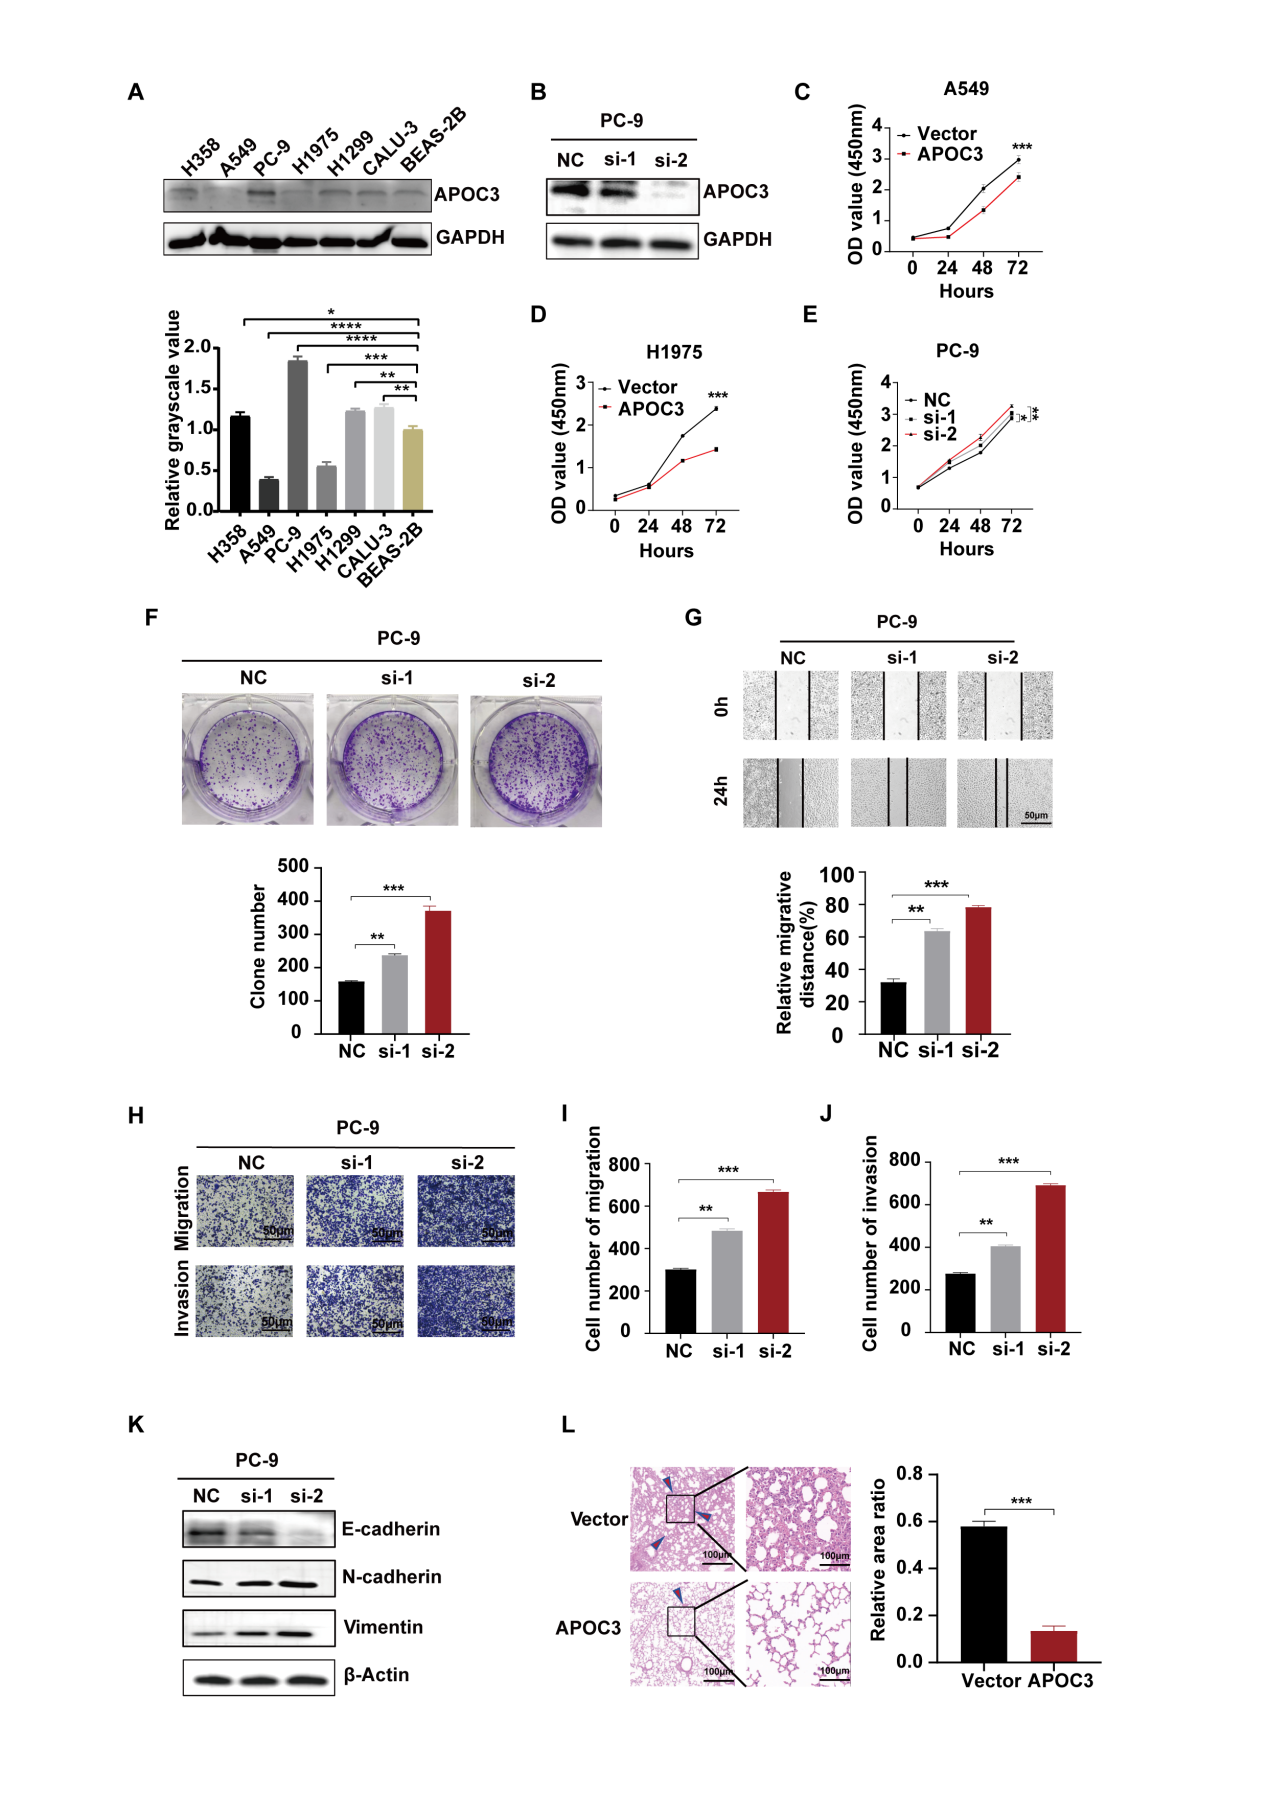


**Figure S2. APOC3 enhances the proliferation, migration, invasion, and EMT of LUAD cells. A** Western blot analysis of APOC3 protein levels in various LUAD cell lines and normal pulmonary epithelial cell line BASE-2B. **B** Validation of APOC3 knockdown efficiency in PC9 cells at the protein levels by Western blot. **C-E** CCK-8 assays assessing the proliferative capacity of A549, H1975, and PC-9 cells upon APOC3 modulation. **F** Colony formation assays demonstrating the effect of APOC3 knockdown on the clonogenic survival of PC-9 cells. **G** Wound healing assays measuring the lateral migration of PC-9 cells influenced by APOC3 expression. **H-J** Transwell assays evaluating the invasive and migratory capacities of PC-9 cells after APOC3 knockdown. **K** Western blot analysis of epithelial-mesenchymal transition (EMT) marker expression in PC-9 cells following APOC3 knockdown. **L** Representative H&E-stained lung sections showing metastatic nodules formed by A549 cells with APOC3 overexpression in vivo.


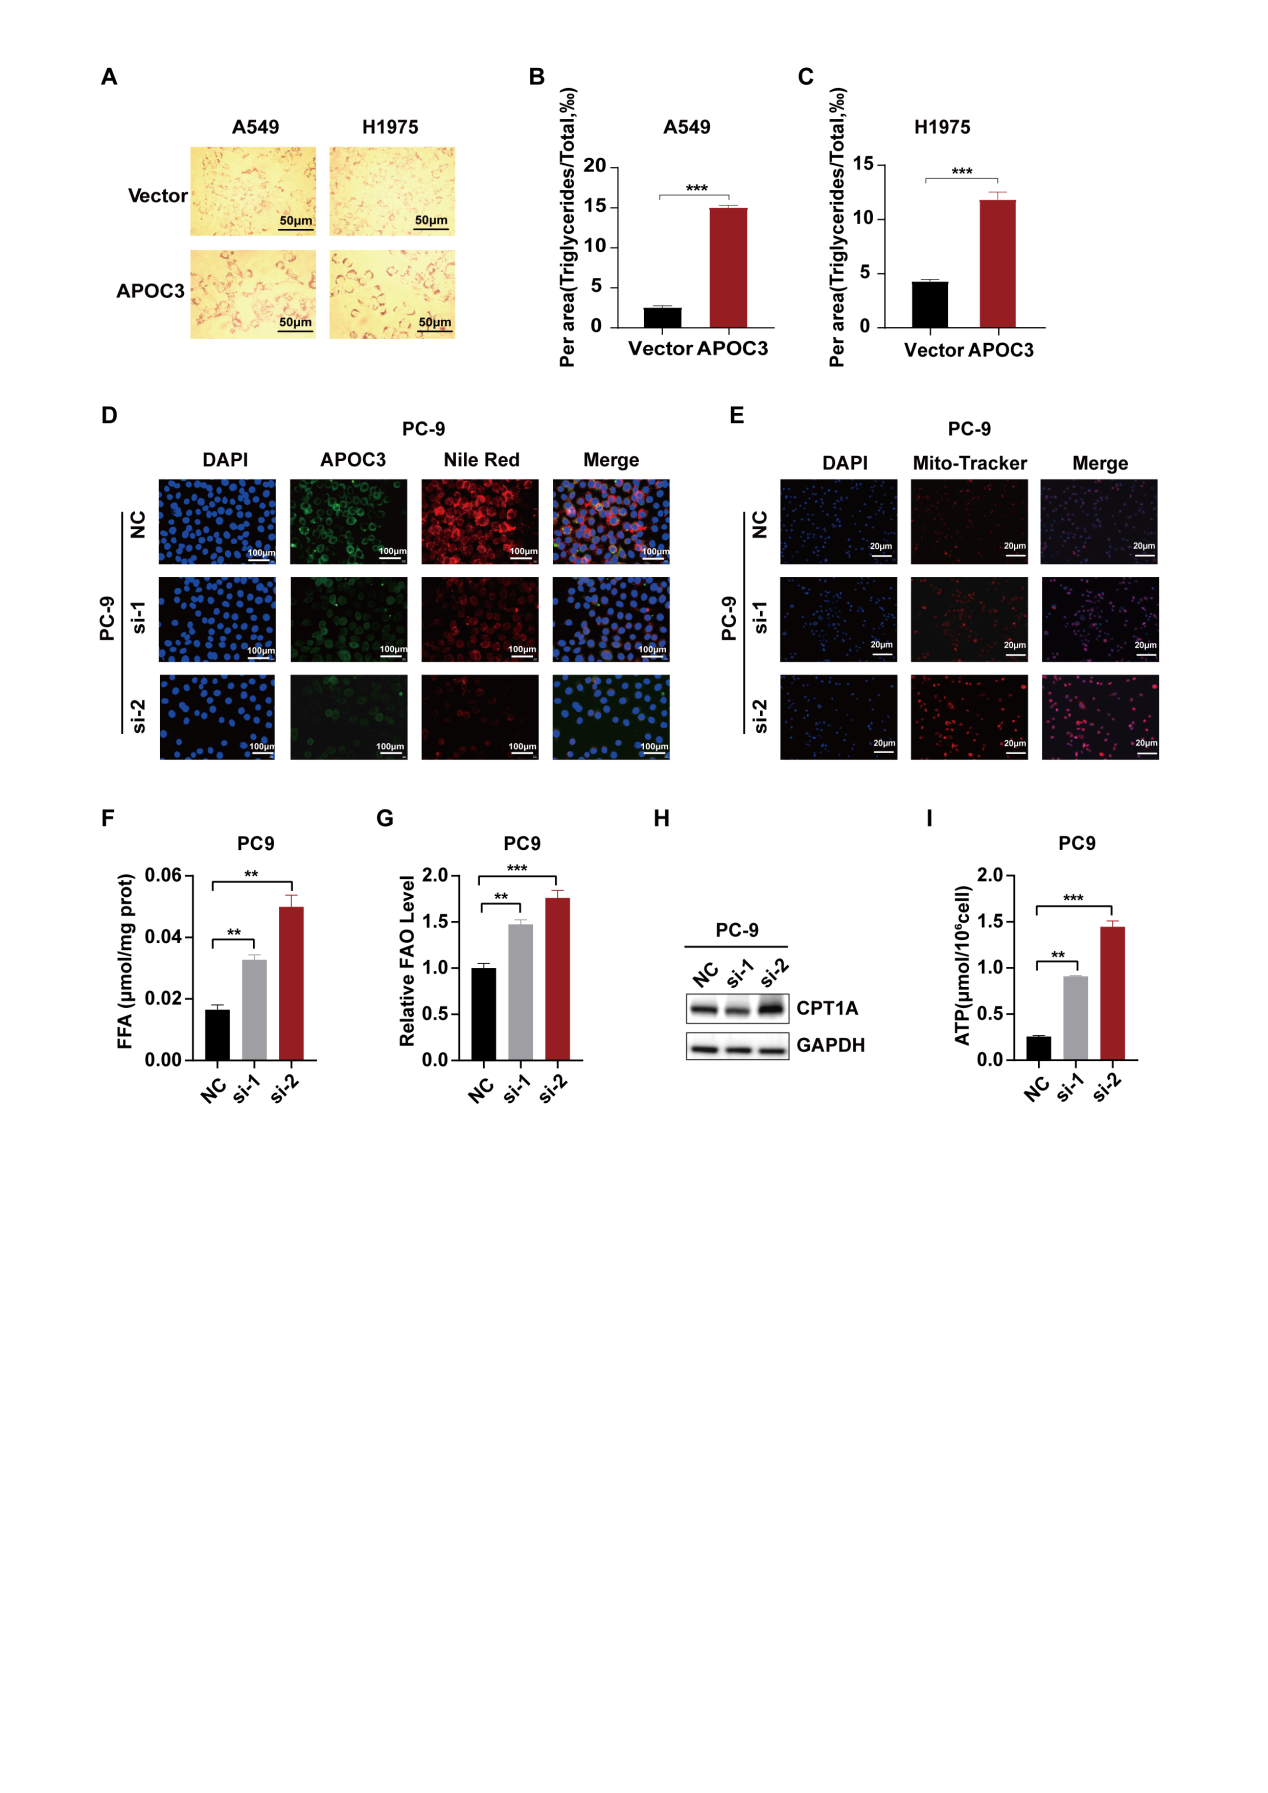


**Fig. S3 APOC3 inhibits fatty acid metabolism in lung adenocarcinoma. A.**Representative images of Oil Red O staining showing lipid droplets in A549 and H1975 cells transfected with APOC3 or empty vector. **B-C**. Quantification of Oil Red O staining intensity in A549**(B)**and H1975**(C)**cells from panel **A. D.**Intracellular lipid droplet content assessed by Nile Red staining upon APOC3 knockdown**. E.**Mitochondrial activity measured by MitoTracker probe following APOC3 knockdown**. F.**Intracellular free fatty acid (FFA) levels after APOC3 knockdown, as determined by a commercial assay kit. **G.**Fatty acid oxidation **(FAO)** capacity in PC-9 cells with APOC3 knockdown. **H.**Western blot analysis of CPT1A protein expression after APOC3 knockdown. **I.**Intracellular ATP levels measured upon APOC3 knockdown.

**Fig. S4 APOC3 inhibits fatty acid metabolism through the cAMP/PKA signaling pathway. A** Heatmap showing the expression of indicated target genes in APOC3-overexpressing (OE) and negative control (NC) cells. **B** Intracellular cAMP levels in H1975 cells after APOC3 overexpression. **C** Western blot analysis of key proteins in the cAMP/PKA signaling pathway following APOC3 overexpression in H1975 cells. **D** Intracellular free fatty acid (FFA) levels in APOC3-OE H1975 cells. **E** Fatty acid oxidation (FAO) enzyme activity in H1975 cells upon APOC3 overexpression. **F** Intracellular ATP levels in H1975 cells with APOC3 overexpression.
